# Supplementary material
Source: HighWire-hosted journal article supplement (https://erj.ersjournals.com/content/57/2/2002368)
Supplement: inline-supplementary-material-1 [file inline-supplementary-material-1.pdf]

## Supplementary Material I

---

**TABLE S1** Patients with the primary efficacy outcome or a major bleeding event within 3 months of enrolment

| Sex, Age (Years) | sPESI (points) | Type of Event               | Dosage            | Days from Enrolment | Length of Rehospitalisation (days) | Description                                                                                  | Management                                                                                |
|------------------|----------------|-----------------------------|-------------------|---------------------|------------------------------------|----------------------------------------------------------------------------------------------|-------------------------------------------------------------------------------------------|
| Female, 46       | 0              | Recurrent PE                | 20 mg once daily  | 29                  | 4                                  | Segmental recurrent PE occurring during rivaroxaban therapy. No haemodynamic decompensation. | Rivaroxaban discontinuation and switch to LMWH. No further complications.                 |
| Male, 46         | ≥ 1            | Recurrent PE                | 15 mg twice daily | 7                   | 6                                  | Segmental recurrent PE occurring during rivaroxaban therapy. No haemodynamic decompensation. | The therapy with rivaroxaban (15 mg twice daily) was continued. No further complications. |
| Female, 47       | 0              | Recurrent PE                | 20 mg once daily  | 75                  | -                                  | Segmental recurrent PE occurring during rivaroxaban therapy. No haemodynamic decompensation. | Rivaroxaban discontinuation and switch to LMWH; no further complications.                 |
| Female, 37       | 0              | Major bleeding <sup>a</sup> | 15 mg twice daily | 12                  | 1                                  | Uterine bleeding.                                                                            | Rivaroxaban discontinuation and switch to LMWH.                                           |

|            |          |                             |                  |    |    |                                                                          |                                                                                                                                                                                 |
|------------|----------|-----------------------------|------------------|----|----|--------------------------------------------------------------------------|---------------------------------------------------------------------------------------------------------------------------------------------------------------------------------|
| Male, 81   | $\geq 1$ | Major bleeding <sup>a</sup> | 20 mg once daily | 57 | 12 | Haemorrhagic shock following acute bleeding from intestinal diverticula. | Red blood cell concentrates; rivaroxaban discontinuation and switch to LMWH. Subsequently, the patient suffered one further gastrointestinal major bleeding episode on heparin. |
| Female, 69 | 0        | Major bleeding <sup>a</sup> | 20 mg once daily | 70 | -  | Gastrointestinal bleeding (onset 10 days before) and anaemia.            | -                                                                                                                                                                               |
| Female, 50 | 0        | Major bleeding <sup>a</sup> | 15 mg once daily | 72 | -  | Uterine bleeding (onset 15 days before).                                 | Rivaroxaban discontinuation.                                                                                                                                                    |
| Female, 49 | 0        | Major bleeding <sup>a</sup> | 20 mg once daily | 57 | 6  | Uterine bleeding (onset 20 days before).                                 | Red blood cell concentrates; rivaroxaban discontinuation and switch to LMWH.                                                                                                    |
| Male, 85   | $\geq 1$ | Major bleeding <sup>a</sup> | 20 mg once daily | 72 | 69 | Intracranial haemorrhage.                                                | After rivaroxaban discontinuation, the patient received prothrombin complex concentrate. He died 69 days later.                                                                 |

<sup>a</sup> As defined by the criteria of the International Society of Thrombosis and Haemostasis.[16]

LMWH: low-molecular-weight heparin; PE: pulmonary embolism; sPESI: simplified Pulmonary Embolism Severity Index.

**TABLE S2** Serious adverse events (n=68) in the safety population within 3 months of enrolment

| Adverse event                                                               | Time of Onset (Days After Enrolment) | Hospitalization Necessary |
|-----------------------------------------------------------------------------|--------------------------------------|---------------------------|
| Progression of oedema (left leg)                                            | 49                                   | Yes                       |
| Kidney stones                                                               | 74                                   | Yes                       |
| Retrosternal pain                                                           | 5                                    | Yes                       |
| Removal of external bone fixator and suspected recurrent pulmonary embolism | 2                                    | Yes                       |
| Gastritis                                                                   | 81                                   | Yes                       |
| Suspected recurrent pulmonary embolism                                      | 7                                    | Yes                       |
| Schizoaffective disorder (manic phase)                                      | 64                                   | Yes                       |
| Anaemia                                                                     | 55                                   | Yes                       |
| Ankle fracture                                                              | 49                                   | Yes                       |
| Infarct pneumonia                                                           | 2                                    | Yes                       |
| Proximal tibial fracture                                                    | 71                                   | Yes                       |
| Gastrointestinal bleeding                                                   | 13                                   | Yes                       |
| Chest pain                                                                  | 20                                   | Yes                       |
| Exertional dyspnoea                                                         | 37                                   | Yes                       |
| Paradoxical septal motion                                                   | 91                                   | No                        |
| Upper gastrointestinal bleeding                                             | 5                                    | Yes                       |
| Acute cytomegalovirus (mononucleosis-like) infection                        | 2                                    | Yes                       |
| Pleuritis                                                                   | 1                                    | Yes                       |
| Reflux oesophagitis                                                         | 2                                    | Yes                       |
| Syncope                                                                     | 12                                   | Yes                       |
| Hypermenorrhoea                                                             | 12                                   | Yes                       |
| Urosepsis and pyelonephritis                                                | 13                                   | Yes                       |
| Allergic reaction (rivaroxaban)                                             | 2                                    | Yes                       |
| Acute renal failure                                                         | 53                                   | Yes                       |
| Hypermenorrhoea                                                             | 20                                   | Yes                       |
| Pneumonia                                                                   | 2                                    | Yes                       |
| Panic attack                                                                | 57                                   | Yes                       |
| Renal colic                                                                 | 1                                    | Yes                       |
| Cancer                                                                      | 47                                   | No                        |
| Infarction pneumonia                                                        | 4                                    | Yes                       |
| Dyspnoea                                                                    | 4                                    | Yes                       |

|                                                       |    |     |
|-------------------------------------------------------|----|-----|
| Gastrointestinal bleeding                             | 57 | Yes |
| Angina pectoris                                       | 57 | Yes |
| Pancreatic cancer                                     | 1  | Yes |
| Bronchial cancer                                      | 13 | Yes |
| Suspected pancreatic cancer                           | 2  | Yes |
| Fever                                                 | 3  | Yes |
| Pneumonia                                             | 2  | Yes |
| Chronic obstructive pulmonary disease                 | 33 | Yes |
| Bleeding                                              | 57 | Yes |
| Bronchial asthma                                      | 35 | Yes |
| Pneumonia                                             | 4  | Yes |
| Elevation of troponin                                 | 1  | Yes |
| Thoracic pain                                         | 32 | Yes |
| Anxious disorder                                      | 4  | Yes |
| Suspected deep vein thrombosis                        | 63 | No  |
| Prostate cancer                                       | 55 | No  |
| Chronic inflammatory demyelinating polyneuropathy     | 4  | Yes |
| Advanced mesothelioma                                 | 34 | Yes |
| Bladder-bowel fistula                                 | 33 | Yes |
| Lobar pneumonia                                       | 70 | Yes |
| Elevation of troponin                                 | 1  | Yes |
| Diarrhea                                              | 85 | Yes |
| Chest pain                                            | 36 | Yes |
| Sepsis                                                | 22 | Yes |
| Suspected recurrent pulmonary embolism                | 75 | No  |
| Exacerbation of chronic obstructive pulmonary disease | 7  | Yes |
| Pneumonia                                             | 12 | Yes |
| Suspected esophagus cancer                            | 13 | Yes |
| Pneumonia                                             | 26 | Yes |
| Pneumonia                                             | 34 | Yes |
| Chest pain                                            | 5  | Yes |
| Hypotension                                           | 29 | Yes |
| Non-ST elevation myocardial infarction                | 3  | Yes |
| Suspected deep vein thrombosis                        | 2  | Yes |
| Stroke                                                | 53 | Yes |
| Chest pain                                            | 2  | Yes |

|                             |    |     |
|-----------------------------|----|-----|
| Advanced endometrial cancer | 26 | Yes |
|-----------------------------|----|-----|

**TABLE S3** Answers to Dimension 2 of PEmb-QoL “At what time of day are your lung symptoms most intense?”

|                        | <b>Week 3</b> | <b>Month 3</b> |
|------------------------|---------------|----------------|
| When waking up         | 8.2%          | 6.1%           |
| At mid-day             | 8.7%          | 6.4%           |
| In the evening         | 16.0%         | 12.2%          |
| During the night       | 5.7%          | 4.0%           |
| At any time of the day | 20.0%         | 14.8%          |
| Never                  | 38.1%         | 53.9%          |
| Not available          | 3.3%          | 2.6%           |

**TABLE S4** Answers to Dimension 3 of PEmb-QoL “Compared to one year ago, how would you rate the condition of your lungs in general now?”

|                 |  | <b>Week 3</b> | <b>Month 3</b> |
|-----------------|--|---------------|----------------|
| Much better     |  | 4.0%          | 14.1%          |
| Slightly better |  | 6.4%          | 8.5%           |
| About the same  |  | 19.1%         | 30.8%          |
| Slightly worse  |  | 27.3%         | 22.6%          |
| Much worse      |  | 13.2%         | 6.8%           |
| No problems     |  | 28.2%         | 15.8%          |
| Not available   |  | 1.9%          | 1.4%           |



**TABLE S5.** Baseline characteristics of the patients who completed the Pulmonary Embolism Quality of Life questionnaire at both visits (week 3 and month 3) versus those who did not (at either or both visits)

| <b>Variable</b>                                        | <b>PEmb-QoL assessed at 3 weeks and 3 months<br/>(N=425)</b> | <b>PEmb-QoL not assessed at either visit<br/>(N=151)</b> |
|--------------------------------------------------------|--------------------------------------------------------------|----------------------------------------------------------|
| <i>Patient Demographics</i>                            |                                                              |                                                          |
| Age (years), mean (SD; range)                          | 57.0 (16.0; 19-90)                                           | 55.2 (18.2; 18-87)                                       |
| Women, n/N (%)                                         | 192/425 (45.2)                                               | 74/151 (49.0)                                            |
| <i>Education Level, n/N (%)</i>                        |                                                              |                                                          |
| Elementary school                                      | 14/384 (3.6)                                                 | 6/135 (4.4)                                              |
| Basic primary school                                   | 42/384 (10.9)                                                | 16/135 (11.9)                                            |
| Secondary general school                               | 97/384 (25.3)                                                | 26/135 (19.3)                                            |
| Intermediate secondary school                          | 95/384 (24.7)                                                | 37/135 (27.4)                                            |
| A-level                                                | 68/384 (17.7)                                                | 27/135 (20.0)                                            |
| University degree                                      | 67/384 (17.4)                                                | 23/135 (17.0)                                            |
| Doctorate                                              | 1/384 (0.3)                                                  | 0                                                        |
| <i>Functional Parameters and Biochemical Markers</i>   |                                                              |                                                          |
| Body mass index (kg/m <sup>2</sup> ), median (Q1-Q3)   | 27.1 (24.3-30.5)                                             | 27.0 (24.4-30.6)                                         |
| Systolic / diastolic blood pressure (mm Hg), mean (SD) | 137 (19) / 80 (12)                                           | 136 (19) / 80 (12)                                       |
| Heart rate (beats per minute), mean (SD)               | 78 (13)                                                      | 77 (13)                                                  |
| Oxygen saturation (%), median (Q1-Q3)                  | 97 (96-98)                                                   | 97 (95-98)                                               |

|                                                                       |                |                |
|-----------------------------------------------------------------------|----------------|----------------|
| Respiratory rate (breaths per minute), median (Q1-Q3)                 | 16 (15-18)     | 16 (14-18)     |
| <i>Risk Factors for Pulmonary Embolism and Comorbidities, n/N (%)</i> |                |                |
| Oestrogen use                                                         | 70/422 (16.6)  | 22/149 (14.8)  |
| Immobilisation (for at least 3 days)                                  | 46/420 (11.0)  | 12/150 (8.0)   |
| Previous deep vein thrombosis                                         | 63/416 (15.1)  | 24/150 (16.0%) |
| Previous pulmonary embolism                                           | 35/421 (8.3)   | 9/151 (6.0)    |
| Recent major surgery (past 30 days)                                   | 27/424 (6.4)   | 11/150 (7.3)   |
| Recent major trauma (past 30 days)                                    | 17/425 (4.0)   | 8/150 (5.3)    |
| Long travel (> 4 hours, past 30 days)                                 | 54/418 (12.9)  | 16/149 (10.7)  |
| Active cancer                                                         | 29/420 (6.9)   | 9/147 (6.1)    |
| Chronic obstructive pulmonary disease                                 | 21/420 (5.0)   | 7/149 (4.7)    |
| Chronic heart failure                                                 | 4/425 (0.9)    | 3/150 (2.0)    |
| Coronary artery disease                                               | 31/422 (7.3)   | 10/148 (6.8)   |
| Arterial hypertension                                                 | 172/425 (40.5) | 69/149 (46.3)  |
| Diabetes mellitus                                                     | 26/425 (6.1)   | 12/151 (7.9)   |
| Simplified Pulmonary Embolism Severity Index (sPESI) $\geq 1$         | 94/412 (22.8)  | 33/144 (22.9)  |

PEmb-QoL: Pulmonary Embolism Quality of Life questionnaire.

**TABLE S6** Baseline characteristics of the patients who completed the EQ-5D-5L questionnaire at both visits (week 3 and month 3) versus those who did not (at either or both visits)

| Variable                                                  | EQ-5D-5L assessed at both<br>3 weeks and 3 months<br>(N=473) | EQ-5D-5L not assessed at<br>either visit<br>(N=103) |
|-----------------------------------------------------------|--------------------------------------------------------------|-----------------------------------------------------|
| <i>Patient Demographics</i>                               |                                                              |                                                     |
| Age (years), mean (SD; range)                             | 56.9 (16.1; 18-90)                                           | 55.1 (18.7; 20-86)                                  |
| Women, n/N (%)                                            | 217/473 (45.9)                                               | 49/103 (47.6)                                       |
| <i>Education Level, n/N (%)</i>                           |                                                              |                                                     |
| Elementary school                                         | 15/429 (3.5)                                                 | 5/90 (5.6)                                          |
| Basic primary school                                      | 46/429 (10.7)                                                | 12/90 (13.3)                                        |
| Secondary general school                                  | 102/429 (23.8)                                               | 21/90 (23.3)                                        |
| Intermediate secondary school                             | 113/429 (26.3)                                               | 19/90 (21.1)                                        |
| A-level                                                   | 78/429 (18.2)                                                | 17/90 (18.9)                                        |
| University degree                                         | 74/429 (17.2)                                                | 16/90 (17.8)                                        |
| Doctorate                                                 | 1/429 (0.2)                                                  | 0                                                   |
| <i>Functional Parameters and Biochemical Markers</i>      |                                                              |                                                     |
| Body mass index (kg/m <sup>2</sup> ), median<br>(Q1-Q3)   | 27.2 (24.4-30.5)                                             | 26.5 (24.0-29.5)                                    |
| Systolic / diastolic blood pressure<br>(mm Hg), mean (SD) | 136 (19) / 80 (12)                                           | 136 (19) / 81 (12)                                  |
| Heart rate (beats per minute), mean<br>(SD)               | 78 (13)                                                      | 78 (12)                                             |
| Oxygen saturation (%), median<br>(Q1-Q3)                  | 97 (96-98)                                                   | 97 (95-98)                                          |

|                                                                       |                |               |
|-----------------------------------------------------------------------|----------------|---------------|
| Respiratory rate (breaths per minute), median (Q1-Q3)                 | 16 (15-18)     | 16 (15-18)    |
| <i>Risk Factors for Pulmonary Embolism and Comorbidities, n/N (%)</i> |                |               |
| Oestrogen use                                                         | 76/470 (16.2)  | 16/101 (15.8) |
| Immobilisation (for at least 3 days)                                  | 49/467 (10.5)  | 9/103 (8.7)   |
| Previous deep vein thrombosis                                         | 69/464 (14.9)  | 18/102 (17.6) |
| Previous pulmonary embolism                                           | 36/469 (7.7)   | 8/103 (7.8)   |
| Recent major surgery (past 30 days)                                   | 31/471 (6.6)   | 7/103 (6.8)   |
| Recent major trauma (past 30 days)                                    | 21/472 (4.4)   | 4/103 (3.9)   |
| Long travel (> 4 hours, past 30 days)                                 | 59/464 (12.7)  | 11/103 (10.7) |
| Active cancer                                                         | 29/467 (6.2)   | 9/100 (9.0)   |
| Chronic obstructive pulmonary disease                                 | 22/469 (4.7)   | 6/100 (6.0)   |
| Chronic heart failure                                                 | 4/473 (0.8)    | 3/102 (2.9)   |
| Coronary artery disease                                               | 30/469 (6.4)   | 11/101 (10.9) |
| Arterial hypertension                                                 | 194/471 (41.2) | 47/103 (45.6) |
| Diabetes mellitus                                                     | 33/473 (7.0)   | 5/103 (4.9)   |
| Simplified Pulmonary Embolism Severity Index (sPESI) $\geq 1$         | 97/457 (21.2)  | 30/99 (30.3)  |
