# Supplementary material
Source: HighWire-hosted journal article supplement (https://erj.ersjournals.com/content/57/2/2002368)
Supplement: inline-supplementary-material-2 [file inline-supplementary-material-2.pdf]

## Supplementary Material II

---

## Formulas for the Calculation of the Pulmonary Embolism Quality of Life (PEmb-QoL) questionnaire

### Frequency of complaints (Dimension 1)

The transformation from  $n\_points$  to the ratio 100-% was done using the following formula:

$$100 - \% = 100 - \frac{n_{points} - \min_{n_{points}} + n_{miss} \cdot \min_{point}}{\frac{\max_{n_{points}} - \min_{n_{points}}}{100} - \frac{\max_{point} - \min_{point}}{100} \cdot n_{miss}}$$

$$= 100 - \frac{n_{points} - 8 + n_{miss} \cdot \min_{point}}{0.32 - 0.04 \cdot n_{miss}}$$

### Limitation daily life (Dimension 4)

The transformation from  $n\_points$  to the ratio 100-% was done using the following formula (if the first question was = 0 or missing):

$$100 - \% = 100 - \frac{n_{points} - \min_{n_{points}} + n_{miss} \cdot \min_{point}}{\frac{\max_{n_{points}} - \min_{n_{points}}}{100} - \frac{\max_{point} - \min_{point}}{100} \cdot n_{miss}}$$

$$= 100 - \frac{n_{points} - 12 + n_{miss} \cdot \min_{point}}{0.24 - 0.02 \cdot n_{miss}}$$

The transformation from  $n\_points$  to the ratio 100-% was done using the following formula (if the first question was > 0):

$$100 - \% = 100 - \frac{n_{points} - \min_{n_{points}} + n_{miss} \cdot \min_{point}}{\frac{\max_{n_{points}} - \min_{n_{points}}}{100} - \frac{\max_{point} - \min_{point}}{100} \cdot n_{miss}}$$

$$= 100 - \frac{n_{points} - 13 + n_{miss}}{0.26 - 0.02 \cdot n_{miss}}$$

### Work-related problems (Dimension 5)

$$100 - \% = 100 - \frac{n_{points} - \min_{n_{points}} + n_{miss} \cdot \min_{point}}{\frac{\max_{n_{points}} - \min_{n_{points}}}{100} - \frac{\max_{point} - \min_{point}}{100} \cdot n_{miss}}$$

$$= 100 - \frac{n_{points} - 4 + n_{miss} \cdot \min_{point}}{0.04 - 1 \cdot n_{miss}}$$

### Social limitations (Dimension 6)

1=0% → 5=100%

**Intensity of complaints (Dimensions 7-8)**

The transformation from  $n\_points$  to the ratio % was done using the following formula:

$$\begin{aligned} \% &= \frac{n_{points} - \min_{n_{points}} + n_{miss} \cdot \min_{point}}{\frac{\max_{n_{points}} - \min_{n_{points}}}{100} - \frac{\max_{point} - \min_{point}}{100} \cdot n_{miss}} \\ &= \frac{n_{points} - 2 + n_{miss} \cdot \min_{point}}{0.100 - 0.05 \cdot n_{miss}} \end{aligned}$$

**Emotional complaints (Dimension 9)**

The transformation from  $n\_points$  to the ratio 100-% was done using the following formula:

$$\begin{aligned} 100 - \% &= 100 - \frac{n_{points} - \min_{n_{points}} + n_{miss} \cdot \min_{point}}{\frac{\max_{n_{points}} - \min_{n_{points}}}{100} - \frac{\max_{point} - \min_{point}}{100} \cdot n_{miss}} \\ &= 100 - \frac{n_{points} - 10 + n_{miss} \cdot \min_{point}}{0.5 - 0.05 \cdot n_{miss}} \end{aligned}$$

with the following notation:

- $n_{points}$ : sum of points over all items per patient
- $n_{miss}$ : number of missing items
- $\max_{n_{points}}$ : maximal possible sum over all items
- $\min_{n_{points}}$ : minimal possible sum over all items
- $\max_{point}$ : maximal possible value per item
- $\min_{point}$ : minimal possible value per item

**Total**

For the present analysis, the specific dimensions are are weighted based on their number of items. The number of items per dimension is distributed as follows:

- frequency of complaints (foc): 8
- limitations of activity in daily life (adl): 12 or 13 (depending on the value of 'I do not work')
- work-related problems (wrp): 4
- social limitation (sl): 1
- intensity of problems (iop): 2
- emotional complaints (ep): 10

resulting in a total of 37 or 38 items over all six dimensions. For calculation a total of 37.5 items is used as the number of 12 or 13 items in the adl-dimension is almost 50:50. The total score is then calculated as follows:

$$\%_{total}^* = \frac{\%_{foc}^* \cdot 8}{37.5} + \frac{\%_{adl}^* \cdot 12.5}{37.5} + \frac{\%_{wrp}^* \cdot 4}{37.5} + \frac{\%_{sl}^* \cdot 1}{37.5} + \frac{\%_{iop}^* \cdot 2}{37.5} + \frac{\%_{ep}^* \cdot 10}{37.5}$$

\*1-% ratio

Multiple imputation (MCMC, assuming all dimensions have a joint multivariate normal distribution) was performed if a dimension was completely missing. The number of missing dimensions was 3.6%.
