# Supplementary material
Source: HighWire-hosted journal article supplement (https://erj.ersjournals.com/content/57/2/2002368)
Supplement: inline-supplementary-material-3 [file inline-supplementary-material-3.pdf]

# Survival and Quality of Life after Early Discharge in Low-Risk Pulmonary Embolism

Stefano Barco<sup>1,2</sup>; Irene Schmidtmann<sup>3</sup>; Walter Ageno<sup>4</sup>; Toni Anušić<sup>3</sup>; Rupert M. Bauersachs<sup>5</sup>; Cecilia Becattini<sup>6</sup>; Enrico Bernardi<sup>7</sup>; Jan Beyer-Westendorf<sup>8,9</sup>; Luca Bonacchini<sup>10</sup>; Johannes Brachmann<sup>11</sup>; Michael Christ<sup>12</sup>; Michael Czihal<sup>13</sup>; Daniel Duerschmied<sup>14</sup>; Klaus Empen<sup>15</sup>; Christine Espinola-Klein<sup>1,16</sup>; Joachim H. Ficker<sup>17</sup>; Cândida Fonseca<sup>18</sup>; Sabine Genth-Zotz<sup>19</sup>; David Jiménez<sup>20</sup>; Veli-Pekka Harjola<sup>21</sup>; Matthias Held<sup>22</sup>; Lorenzo Iogna Prat<sup>23</sup>; Tobias J. Lange<sup>24</sup>; Mareike Lankeit<sup>1,25,26</sup>; Athanasios Manolis<sup>27</sup>; Andreas Meyer<sup>28</sup>; Pirjo Mustonen<sup>29</sup>; Ursula Rauch-Kroehnert<sup>30</sup>; Pedro Ruiz-Artacho<sup>31,32</sup>; Sebastian Schellong<sup>33</sup>; Martin Schwaiblmair<sup>34</sup>; Raoul Stahrenberg<sup>35</sup>; Luca Valerio<sup>1</sup>; Peter E. Westerweel<sup>36</sup>; Philipp S. Wild<sup>1,37,38</sup>; and Stavros V. Konstantinides<sup>1,39</sup>, on behalf of the HoT-PE Investigators

- 1) Center for Thrombosis and Hemostasis (CTH), University Medical Center of the Johannes Gutenberg University, Mainz, Germany;
- 2) Clinic of Angiology, University Hospital Zurich, Zurich, Switzerland;
- 3) Institute of Medical Biostatistics, Epidemiology and Informatics (IMBEI), University Medical Center Mainz, Germany;
- 4) Research Center on Thromboembolic Diseases and Antithrombotic Therapies, Department of Medicine and Surgery, University of Insubria, Varese, Italy;
- 5) Department of Vascular Medicine, Klinikum Darmstadt, Darmstadt, Germany;
- 6) Internal and Cardiovascular Medicine - Stroke Unit, University of Perugia, Perugia, Italy;
- 7) Department of Emergency Medicine, ULSS 2 Marca Trevigiana – Ospedale di Treviso (Treviso), Italy;
- 8) Thrombosis Research Unit, Division of Hematology, Department of Medicine I, University Hospital "Carl Gustav Carus", Dresden, Germany;
- 9) Kings Thrombosis Service, Department of Hematology, Kings College London, London, United Kingdom;
- 10) S.C. Medicina d'Urgenza e Pronto Soccorso, ASST Grande Ospedale Metropolitano Niguarda, Milano;
- 11) II Medical Department, Coburg Hospital, Coburg, Germany;
- 12) Emergency Care (Notfallzentrum), Luzerner Kantonsspital, Switzerland;

- 13) Division of Vascular Medicine, Hospital of the Ludwig-Maximilians-University, Munich, Germany;
- 14) Cardiology and Angiology I, Heart Center, Faculty of Medicine, University of Freiburg, Freiburg, Germany;
- 15) Department of Internal Medicine, Städtisches Klinikum Dessau, Germany;
- 16) Department of Cardiology, Cardiology I, University Medical Center Mainz of the Johannes Gutenberg-University, Mainz, Germany;
- 17) Department of Respiratory Medicine, Nuremberg General Hospital / Paracelsus Medical University, Nuremberg, Germany
- 18) Department of Internal Medicine, Hospital S. Francisco Xavier/CHLO, NOVA Medical School, Faculdade de Ciências Médicas, Universidade Nova de Lisboa, Lisbon, Portugal;
- 19) Department of Internal Medicine I, Katholisches Klinikum Mainz, Mainz, Germany;
- 20) Respiratory Department, Ramón y Cajal Hospital, Universidad de Alcala, IRYCIS, CIBER de Enfermedades Respiratorias, CIBERES, Madrid, Spain;
- 21) Emergency Medicine, University of Helsinki and Department of Emergency Medicine and Services, Helsinki University Hospital, Helsinki, Finland;
- 22) Medical Mission Hospital, Department of Internal Medicine, Respiratory Medicine and Ventilatory Support, Academic Teaching Hospital of the Julius-Maximilian University of Wuerzburg, Wuerzburg, Germany;
- 23) Pronto Soccorso-Medicina d'Urgenza Ospedale Santa Maria del Carmine, Rovereto, Italy;
- 24) Department of Internal Medicine II, Division of Pneumology, University Medical Center Regensburg, Regensburg, Germany;
- 25) Department of Internal Medicine and Cardiology, Campus Virchow Klinikum, Charité - University Medicine Berlin, Germany;
- 26) Clinic of Cardiology and Pneumology, Heart Center, University Medical Center Goettingen, Germany;
- 27) Department of Cardiology, General Hospital 'Asklepeion Voulas', Athens, Greece;
- 28) Kliniken Maria Hilf, Klinik für Pneumologie, Krankenhaus St. Franziskus, Mönchengladbach;
- 29) Keski-Suomi Central hospital and University of Jyväskylä, Finland;
- 30) Department of Cardiology, University Heart Center Berlin and Charité Universitätsmedizin Berlin, Germany; German Center for Cardiovascular Research (DZHK), Berlin, Germany;
- 31) Emergency Department, Clinico San Carlos Hospital, IdISSC, Madrid, Spain;
- 32) Internal Medicine Department, Clinica Universidad de Navarra, Madrid, Spain; CIBER de Enfermedades Respiratorias, CIBERES, Madrid, Spain; Interdisciplinar Teragnosis and Radiosomics (INTRA) Research Group, Universidad de Navarra, Spain;
- 33) Medical Department 2, Municipal Hospital Dresden, Dresden, Germany;

- 34) Department of Cardiology, Respiratory Medicine and Intensive Care, Klinikum Augsburg,  
Ludwig-Maximilians-University Munich, Germany;
- 35) Helios Albert-Schweitzer-Klinik, Northeim, Germany;
- 36) Department of Internal Medicine, Albert Schweitzer Hospital, Dordrecht, The Netherlands;
- 37) German Center for Cardiovascular Research (DZHK), Partner Site Rhine Main, Mainz, Germany;
- 38) Preventive Cardiology and Preventive Medicine, Center for Cardiology, University Medical  
Center of the Johannes Gutenberg University Mainz, Mainz, Germany;
- 39) Department of Cardiology, Democritus University of Thrace, Alexandroupolis, Greece;

### **Corresponding Author**

Stavros V. Konstantinides, MD

Center for Thrombosis and Hemostasis, University Medical Center Mainz

Langenbeckstrasse 1, Building 403, 55131 Mainz, Germany

Phone: +49 6131 17 8382; Fax: +49 6131 17 3456.

E-mail: [stavros.konstantinides@unimedizin-mainz.de](mailto:stavros.konstantinides@unimedizin-mainz.de)

## COMMITTEES

### *Principal Investigator and Steering Committee Members*

Stavros V. Konstantinides (Principal Investigator), Rupert Bauersachs, Christoph Bode, Michael Christ, Christine Espinola-Klein, Annette Geibel, Mareike Lankeit, Michael Pfeifer, Sebastian Schellong, Philipp Wild, Harald Binder, Kurt Quitzau

### *Writing Committee*

Stefano Barco, Irene Schmidtmann, Stavros Konstantinides

### *Clinical Events Committee*

Michael Czihal, Tobias J. Lange, Raoul Stahrenberg

### *Data and Safety Monitoring Board*

Thomas Meinertz, Menno V. Huisman, Paolo Prandoni, Walter Lehmacher

### *Academic Sponsor*

University Medical Center of the Johannes Gutenberg University, Mainz, Germany

### *Academic Research Organization of the Sponsor*

Interdisciplinary Center for Clinical Studies (IZKS) Mainz

### *Study Coordination and Management*

Kurt Quitzau, Nadine Martin, Dorothea Becker, Stanislav Gorbulev, Kai Kronfeld

### *Trial Statisticians*

Irene Schmidtmann, Harald Binder, Toni Anusic.

## NATIONAL COORDINATORS, LOCAL INVESTIGATORS AND STUDY CENTERS

### *Germany (Stavros V. Konstantinides)*

1. Martin Schwaiblmair (Department of Cardiology, Respiratory Medicine and Intensive Care, Klinikum Augsburg, Ludwig-Maximilians-University Munich)
2. Ursula Rauch-Kröhnert (Department of Cardiology, University Heart Center Berlin and Charité Universitätsmedizin Berlin, Germany; German Center for Cardiovascular Research (DZHK), Berlin)
3. Martin Möckel (Innere Medizin mit Schwerpunkt Gastroenterologie und Nephrologie, Notfallmedizin, Chest Pain Units, Charité Universitätsmedizin Berlin)
4. Johannes Brachmann (II Medical Department, Coburg Hospital, Coburg)
5. Rupert Martin Bauersachs (Department of Vascular Medicine, Klinikum Darmstadt, Darmstadt)
6. Sebastian Schellong (Vascular Center, Municipal Hospital of Dresden-Friedrichstadt, Dresden)
7. Jan Beyer-Westendorf (Thrombosis Research Unit, Division of Hematology, Department of Medicine I, University Hospital "Carl Gustav Carus", Dresden)
8. Daniel Duerschmied (Cardiology and Angiology I, Heart Center, Faculty of Medicine, University of Freiburg, Freiburg)
9. Sabine Blaschke (Interdisziplinäre Notaufnahme, Universitätsmedizin Göttingen)
10. Marius M. Hoeper (Klinik für Pneumologie, Medizinische Hochschule Hannover)
11. Evangelos Giannitis (Innere Medizin III, Universitätsklinikum Heidelberg)
12. Klaus Empen (Department of Internal Medicine, University Medical Center, Greifswald)
13. Rainer Schmiedel (Praxis für Interventionelle Angiologie, Kaiserslautern)
14. Ulrich Hoffman (Angiologie - Interdisziplinäres Gefäßzentrum, Klinikum der Universität München)
15. Ibrahim Akin (1. Medizinische Klinik, Universitätsmedizin Mannheim, Mannheim)
16. Andreas Meyer (Kliniken Maria Hilf, Klinik für Pneumologie, Krankenhaus St. Franziskus, Mönchengladbach)
17. Stavros V. Konstantinides (Center for Thrombosis and Hemostasis (CTH), University Medical Center of the Johannes Gutenberg University, Mainz)
18. Sabine Genth-Zotz (Department of Internal Medicine I, Katholisches Klinikum Mainz, Mainz)

19. Joachim Ficker (Department of Respiratory Medicine, Nuremberg General Hospital / Paracelsus Medical University, Nuremberg)
20. Tobias Geisler (Medizinische Klinik, Abt. III/Kardiologie, Universitätsklinikum Tübingen)
21. Matthias Held (Medical Mission Hospital, Department of Internal Medicine, Academic Teaching Hospital of the Julius-Maximilian University of Wuerzburg, Wuerzburg)

*Italy (Cecilia Becattini)*

1. Walter Ageno (Research Center on Thromboembolic Diseases and Antithrombotic Therapies, Department of Medicine and Surgery, University of Insubria, Varese)
2. Lorenzo Iogna Prat (Emergency Medicine, Santa Maria della Misericordia Hospital, Udine)
3. Cecilia Becattini (Internal Vascular and Emergency Medicine and Stroke Unit, University of Perugia, Perugia)
4. Enrico Bernardi (Department of Emergency Medicine, ULSS n.7, Conegliano, Treviso)
5. Giuseppe Bettoni (S.C. Medicina d'Urgenza e Pronto Soccorso, ASST Grande Ospedale Metropolitano Niguarda, Milano)
6. Roberto Cosentini (Emergency Medicine Department, ASST Papa Giovanni XIII, Bergamo)
7. Paolo Moscatelli (Emergency Medicine Department, San Martino Teaching Hospital, Genova University, Genova)
8. Cinzia Nitti (Internal and Subintensive Medicine Department, Azienda OspedalieroUniversitaria "Ospedali Riuniti", Ancona)
9. Lucia Pierpaoli (Pronto Soccorso e Medicina d'Urgenza, Ospedale di Ravenna, Ravenna)
10. Raffaele Pesavento (Department of Medicine, University Hospital of Padua, Padua),
11. Alessandra Ascani (Medicina di Urgenza, Azienda Ospedaliera 'Santa Maria', Terni)
12. Nicola Montano (Emergency Department, Fondazione IRCCS Ca' Granda - Ospedale Maggiore Policlinico, Milan, Italy; Department of Clinical Sciences and Community Health, Università degli Studi di Milano, Milano)
13. Francesca Cortellaro (Emergency Medicine Department, ASST Grande Ospedale Metropolitano Niguarda, Milan)

*The Netherlands (Peter E. Westerweel)*

1. Peter E. Westerweel (Department of Hematology, Albert Schweitzer Hospital, Dordrecht)

*Spain (David Jiménez)*

1. Jaime Abelaira (Emergency Department, Clinico San Carlos Hospital, IdISSC, Madrid)
2. David Jiménez (Respiratory Department, Hospital Ramón y Cajal and Medicine Department, Universidad de Alcalá-IRYCIS, Madrid)
3. Aitor Ballaz-Quincoces (Servicio de Neumología, Hospital de Galdakao-Usansolo Barrio Labeaga, Galdakao, Bizkaia)
4. Raquel Lopez Reyes (Pneumology Department, Hospital Universitario y Politécnico la Fe de Valencia, Valencia)
5. Remedios Otero (Respiratory Department, Instituto de Biomedicina de Sevilla-IBiS, Centro de Investigación Biomédica en Red de Enfermedades Respiratorias-CIBERES, Hospital Universitario Virgen del Rocío, Sevilla)

*Portugal (Candida Fonseca)*

1. Tiago Judas (Department of Internal Medicine, Hospital Garcia de Orta, Almada)
2. Inês Araujo (Unidade de Insuficiência Cardíaca, Serviço de Medicina III, Hospital São Francisco Xavier, Lisbon, Portugal; NOVA Medical School, Faculdade de Ciências Médicas, Universidade Nova de Lisboa)
3. Sergio Baptista (Hospital da Luz, Lisbon)
4. Fabienne Goncalves (Unidade de Doença Vascular Pulmonar, Hospital Santo António, Centro Hospitalar do Porto, Porto, Portugal; Serviço de Medicina Interna, Hospital Santo António, Centro Hospitalar do Porto)

*Finland (Veli-Pekka Harjola)*

1. Pirjo Mustonen (Keski-Suomi Central Hospital, Jyväskylä)
2. Veli-Pekka Harjola (Emergency Medicine, University of Helsinki and Department of Emergency Medicine and Services, Helsinki University Hospital, Helsinki)

*Greece (Athanasios Manolis)*

1. Georgios Hahalis (Department of Cardiology, University General Hospital of Patras, Rio Achaia)
2. Athanasios Manginas (Department of Cardiology, Mediterraneo Hospital, Athens)
3. Konstantinos Gougoulanis (Department of Pulmonology, University of Thessaly, Larissa)
4. Athanasios Manolis (Department of Cardiology, General Hospital 'Asklepeion Voulas', Athens)
