# Supplementary material
Source: HighWire-hosted journal article supplement (https://erj.ersjournals.com/content/57/2/2002368)
Supplement: inline-supplementary-material-4 [file inline-supplementary-material-4.pdf]

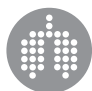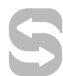

SHAREABLE PDF

# Survival and quality of life after early discharge in low-risk pulmonary embolism

Stefano Barco <sup>1,2</sup>, Irene Schmidtman<sup>3</sup>, Walter Ageno<sup>4</sup>, Toni Anušić<sup>3</sup>, Rupert M. Bauersachs <sup>5</sup>, Cecilia Becattini<sup>6</sup>, Enrico Bernardi<sup>7</sup>, Jan Beyer-Westendorf<sup>8,9</sup>, Luca Bonacchini<sup>10</sup>, Johannes Brachmann<sup>11</sup>, Michael Christ<sup>12</sup>, Michael Czihal<sup>13</sup>, Daniel Duerschmied<sup>14</sup>, Klaus Empen<sup>15</sup>, Christine Espinola-Klein<sup>16</sup>, Joachim H. Ficker <sup>17</sup>, Cândida Fonseca <sup>18</sup>, Sabine Genth-Zotz<sup>19</sup>, David Jiménez <sup>20</sup>, Veli-Pekka Harjola<sup>21</sup>, Matthias Held<sup>22</sup>, Lorenzo Iogna Prat<sup>23</sup>, Tobias J. Lange<sup>24</sup>, Mareike Lankeit <sup>1,25,26</sup>, Athanasios Manolis<sup>27</sup>, Andreas Meyer<sup>28</sup>, Thomas Münzel<sup>16,29</sup>, Pirjo Mustonen<sup>30</sup>, Ursula Rauch-Kroehnert<sup>31,32</sup>, Pedro Ruiz-Artacho<sup>33,34,35,36</sup>, Sebastian Schellong<sup>37</sup>, Martin Schwaiblmair<sup>38</sup>, Raoul Stahrenberg<sup>39</sup>, Luca Valerio <sup>1</sup>, Peter E. Westerweel<sup>40</sup>, Philipp S. Wild<sup>1,29,41</sup> and Stavros V. Konstantinides <sup>1,42</sup> on behalf of the HoT-PE Investigators<sup>43</sup>

**Affiliations:** <sup>1</sup>Center for Thrombosis and Hemostasis (CTH), University Medical Center of the Johannes Gutenberg University Mainz, Mainz, Germany. <sup>2</sup>Clinic of Angiology, University Hospital Zurich, Zurich, Switzerland. <sup>3</sup>Institute of Medical Biostatistics, Epidemiology and Informatics (IMBEI), University Medical Center of the Johannes Gutenberg University Mainz, Mainz, Germany. <sup>4</sup>Research Center on Thromboembolic Diseases and Antithrombotic Therapies, Dept of Medicine and Surgery, University of Insubria, Varese, Italy. <sup>5</sup>Dept of Vascular Medicine, Klinikum Darmstadt, Darmstadt, Germany. <sup>6</sup>Internal and Cardiovascular Medicine – Stroke Unit, University of Perugia, Perugia, Italy. <sup>7</sup>Dept of Emergency Medicine, ULSS 2 Marca Trevigiana – Ospedale di Treviso, Treviso, Italy. <sup>8</sup>Thrombosis Research Unit, Division of Hematology, Dept of Medicine I, University Hospital “Carl Gustav Carus”, Dresden, Germany. <sup>9</sup>Kings Thrombosis Service, Dept of Haematology, Kings College London, London, UK. <sup>10</sup>S.C. Medicina d’Urgenza e Pronto Soccorso, ASST Grande Ospedale Metropolitano Niguarda, Milan, Italy. <sup>11</sup>II Medical Dept, Coburg Hospital, Coburg, Germany. <sup>12</sup>Emergency Care (Notfallzentrum), Luzerner Kantonsspital, Lucerne, Switzerland. <sup>13</sup>Division of Vascular Medicine, Hospital of the Ludwig Maximilians University, Munich, Germany. <sup>14</sup>Cardiology and Angiology I, Heart Center, Faculty of Medicine, University of Freiburg, Freiburg, Germany. <sup>15</sup>Dept of Internal Medicine, Städtisches Klinikum Dessau, Dessau-Roßlau, Germany. <sup>16</sup>Dept of Cardiology, Cardiology I, University Medical Center of the Johannes Gutenberg University Mainz, Mainz, Germany. <sup>17</sup>Dept of Respiratory Medicine, Nuremberg General Hospital/Paracelsus Medical University, Nuremberg, Germany. <sup>18</sup>Dept of Internal Medicine, Hospital S. Francisco Xavier/CHLO, NOVA Medical School, Faculdade de Ciências Médicas, Universidade Nova de Lisboa, Lisbon, Portugal. <sup>19</sup>Dept of Internal Medicine I, Katholisches Klinikum Mainz, Mainz, Germany. <sup>20</sup>Respiratory Dept, Ramón y Cajal Hospital, Universidad de Alcalá, IRYCIS, CIBER de Enfermedades Respiratorias (CIBERES), Madrid, Spain. <sup>21</sup>Emergency Medicine, University of Helsinki and Dept of Emergency Medicine and Services, Helsinki University Hospital, Helsinki, Finland. <sup>22</sup>Medical Mission Hospital, Dept of Internal Medicine, Respiratory Medicine and Ventilatory Support, Academic Teaching Hospital of the Julius Maximilian University of Würzburg, Würzburg, Germany. <sup>23</sup>Pronto Soccorso-Medicina d’Urgenza, Ospedale Santa Maria del Carmine, Rovereto, Italy. <sup>24</sup>Dept of Internal Medicine II, Division of Pneumology, University Medical Center Regensburg, Regensburg, Germany. <sup>25</sup>Dept of Internal Medicine and Cardiology, Campus Virchow Klinikum, Charité Universitätsmedizin Berlin, Berlin, Germany. <sup>26</sup>Clinic of Cardiology and Pneumology, Heart Center, University Medical Center Goettingen, Goettingen, Germany. <sup>27</sup>Dept of Cardiology, General Hospital “Asklepeion Voulas”, Athens, Greece. <sup>28</sup>Kliniken Maria Hilf, Klinik für Pneumologie, Krankenhaus St Franziskus, Mönchengladbach, Germany. <sup>29</sup>German Center for Cardiovascular Research (DZHK), Partner Site Rhine Main, Mainz, Germany. <sup>30</sup>Keski-Suomi Central Hospital and University of Jyväskylä, Jyväskylä, Finland. <sup>31</sup>Dept of Cardiology, University Heart Center Berlin and Charité Universitätsmedizin Berlin, Berlin, Germany. <sup>32</sup>German Center for Cardiovascular Research (DZHK), Berlin, Germany. <sup>33</sup>Emergency Dept, Clínico San Carlos Hospital, IdISSC, Madrid, Spain. <sup>34</sup>Internal Medicine Dept, Clínica Universidad de Navarra, Madrid, Spain. <sup>35</sup>CIBER de Enfermedades Respiratorias (CIBERES), Madrid, Spain. <sup>36</sup>Interdisciplinar Teragnosis and Radiomics (INTRA) Research Group, Universidad de Navarra, Madrid, Spain. <sup>37</sup>Medical Dept 2, Municipal Hospital Dresden, Dresden, Germany. <sup>38</sup>Dept of Cardiology, Respiratory Medicine and Intensive Care, Klinikum Augsburg, Ludwig Maximilians University Munich, Augsburg, Germany. <sup>39</sup>Helios Albert-Schweitzer-Klinik, Northeim, Germany. <sup>40</sup>Dept of Internal Medicine, Albert Schweitzer Hospital, Dordrecht, The Netherlands. <sup>41</sup>Preventive Cardiology and Preventive Medicine, Center for Cardiology, University Medical Center of the Johannes Gutenberg University Mainz, Mainz, Germany. <sup>42</sup>Dept of Cardiology, Democritus University of Thrace, Alexandroupolis, Greece. <sup>43</sup>A full list of the HoT-PE Investigators can be found in the Acknowledgements section.

**Correspondence:** Stavros V. Konstantinides, Center for Thrombosis and Hemostasis (CTH), University Medical Center Mainz, Langenbeckstrasse 1, Building 403, 55131 Mainz, Germany.  
E-mail: stavros.konstantinides@unimedizin-mainz.de

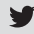

@ERSpublications

The results of the complete primary outcome analysis of the HoT-PE study, as well as long-term mortality and quality-of-life data, support early discharge and ambulatory oral anticoagulation with rivaroxaban for selected patients with acute low-risk PE <https://bit.ly/32qX0mu>

**Cite this article as:** Barco S, Schmidtman I, Ageno W, *et al.* Survival and quality of life after early discharge in low-risk pulmonary embolism. *Eur Respir J* 2021; 57: 2002368 [<https://doi.org/10.1183/13993003.02368-2020>].

This single-page version can be shared freely online.

#### ABSTRACT

**Introduction:** Early discharge of patients with acute low-risk pulmonary embolism requires validation by prospective trials with clinical and quality-of-life outcomes.

**Methods:** The multinational Home Treatment of Patients with Low-Risk Pulmonary Embolism with the Oral Factor Xa Inhibitor Rivaroxaban (HoT-PE) single-arm management trial investigated early discharge followed by ambulatory treatment with rivaroxaban. The study was stopped for efficacy after the positive results of the predefined interim analysis at 50% of the planned population. The present analysis includes the entire trial population (576 patients). In addition to 3-month recurrence (primary outcome) and 1-year overall mortality, we analysed self-reported disease-specific (Pulmonary Embolism Quality of Life (PEmb-QoL) questionnaire) and generic (five-level five-dimension EuroQoL (EQ-5D-5L) scale) quality of life as well as treatment satisfaction (Anti-Clot Treatment Scale (ACTS)) after pulmonary embolism.

**Results:** The primary efficacy outcome occurred in three (0.5%, one-sided upper 95% CI 1.3%) patients. The 1-year mortality was 2.4%. The mean $\pm$ SD PEmb-QoL decreased from 28.9 $\pm$ 20.6% at 3 weeks to 19.9 $\pm$ 15.4% at 3 months, a mean change (improvement) of -9.1% ( $p<0.0001$ ). Improvement was consistent across all PEmb-QoL dimensions. The EQ-5D-5L was 0.89 $\pm$ 0.12 at 3 weeks after enrolment and improved to 0.91 $\pm$ 0.12 at 3 months ( $p<0.0001$ ). Female sex and cardiopulmonary disease were associated with poorer disease-specific and generic quality of life; older age was associated with faster worsening of generic quality of life. The ACTS burden score improved from 40.5 $\pm$ 6.6 points at 3 weeks to 42.5 $\pm$ 5.9 points at 3 months ( $p<0.0001$ ).

**Conclusions:** Our results further support early discharge and ambulatory oral anticoagulation for selected patients with low-risk pulmonary embolism. Targeted strategies may be necessary to further improve quality of life in specific patient subgroups.
